# Supplementary material
Source: PubMed Central journal article supplement (PMC4933172)
Supplement: 10.1074_M116.732487_jbc.M116.732487-1.pdf [file 10.1074_M116.732487_jbc.M116.732487-1.pdf]

## SUPPLEMENTAL DATA

Structural and Kinetic Analysis of Miscoding Opposite the DNA Adduct 1,*N*<sup>6</sup>-Ethenodeoxyadenosine by Human Translesion DNA Polymerase  $\eta$

**Amritraj Patra<sup>#</sup>, Yan Su<sup>#</sup>, Qianqian Zhang<sup>#</sup>, Kevin M. Johnson, F. Peter Guengerich<sup>1</sup>, and Martin Egli<sup>1</sup>**

*From the Department of Biochemistry, Vanderbilt University School of Medicine, Nashville, Tennessee 37232-0146*

*J. Biol. Chem.* **291**, xxx-xxx, 2016

### CONTENTS

**FIGURE S1. Steady-state kinetics of incorporation of individual dNTPs opposite 1,*N*<sup>6</sup>- $\epsilon$ dA by hpol  $\eta$ .**

**FIGURE S2. Pre-steady-state kinetics of incorporation of individual dNTPs opposite 1,*N*<sup>6</sup>- $\epsilon$ dA by hpol  $\eta$ .**

**FIGURE S3. LC-MS analysis of extension products.**

Table S1. Predicted CID fragment ions of frameshift product (pAT\_GAGG) from hpol  $\eta$  extension of the 18-mer primer sequence.





FIGURE S3. LC-MS analysis of extension products. See Table 5 for calculated results.

Substrate A-U 5'-(FAM)TCG TAA GCG TCU T -3'  
 3'-AGC ATT CGC AGT A( $\epsilon$ dA)C ACT-5'

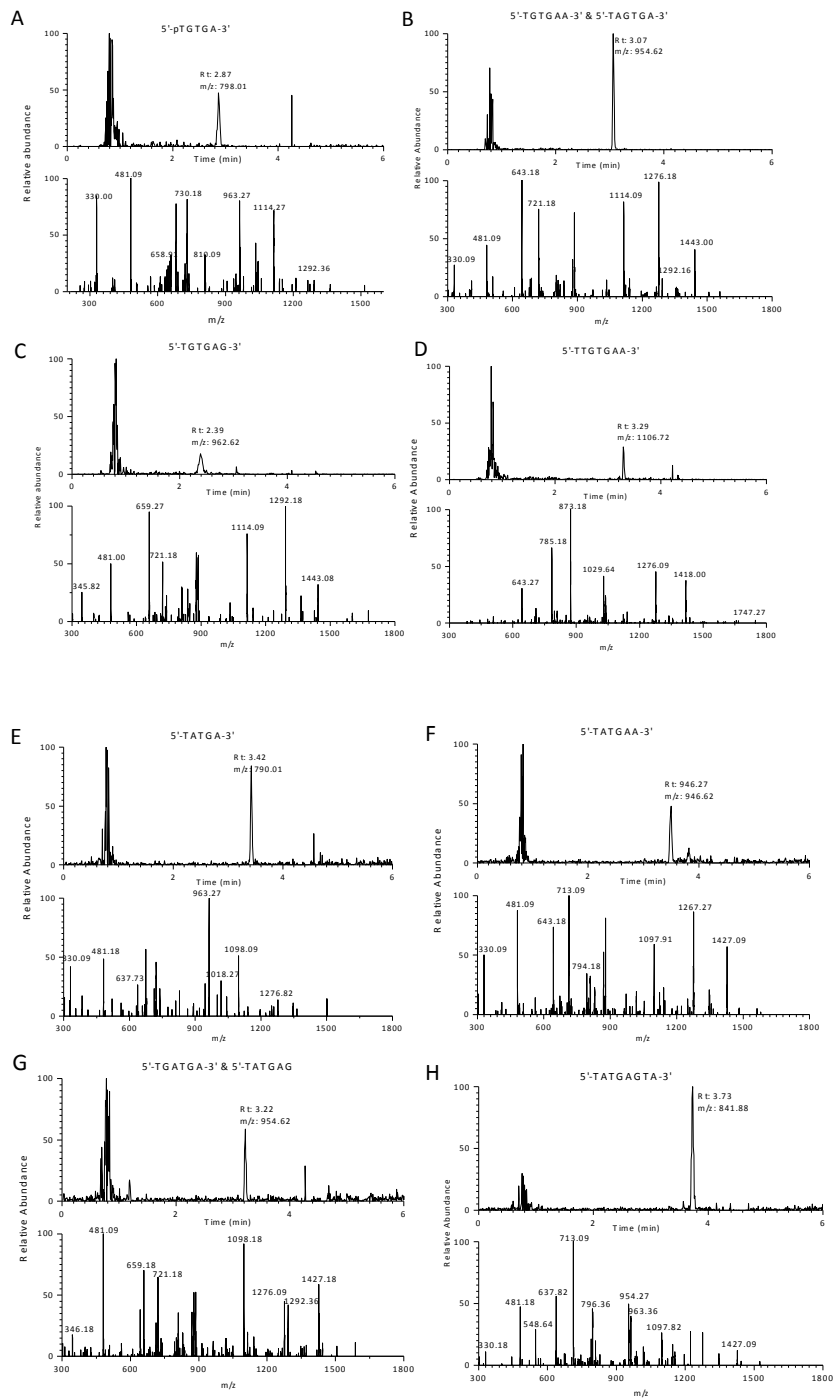

Table S1. Predicted CID fragment ions of frameshift product (pAT\_GAGG) from hpol  $\eta$  extension of the 18-mer primer sequence.

LC-MS analysis of products of extension of primer (opposite template 1,N<sup>6</sup>- $\epsilon$ dA, Substrate C-U, Table 1) by hpol  $\eta$  in the presence of all four dNTPs. (Underscore indicates a deletion in product.) See Fig. 1B.

| n | Charge | <i>m/z</i> ,<br>a-B ion | <i>m/z</i> ,<br>w ion |
|---|--------|-------------------------|-----------------------|
| 1 | -1     |                         | 346.21                |
| 2 | -1     | 490.29                  | 675.42                |
|   | -2     | 244.64                  | 337.21                |
| 3 | -1     | 794.48                  | 988.64                |
|   | -2     | 396.74                  | 493.81                |
| 4 | -1     | 1123.69                 | 1317.85               |
|   | -2     | 561.34                  | 658.42                |
| 5 | -1     | 1436.9                  | 1622.04               |
|   | -2     | 717.95                  | 810.52                |
